# Supplementary material for: Super-Enhancer LncRNA LINC00162 Promotes Progression of Bladder Cancer
Source: PubMed Central journal article supplement — iScience. 2020 Nov 24;23(12):101857. doi: 10.1016/j.isci.2020.101857 (PMC7736918; doi:10.1016/j.isci.2020.101857), 2020-11-24
Supplement: mmc1.pdf [file mmc1.pdf]

iScience, Volume 23

## **Supplemental Information**

### **Super-Enhancer LncRNA LINC00162**

#### **Promotes Progression of Bladder Cancer**

**Xin Wang, Ruirui Zhang, Shuilian Wu, Liping Shen, Meixia Ke, Yan Ouyang, Mengqi Lin, Yiting Lyu, Binuo Sun, Zhijian Zheng, Jialei Yang, Jie Yang, Wenmin Lu, Yiping Yang, Danni Li, Yunfeng Zou, Haishan Huang, and Aruo Nan**

# Supplemental information file

**Table S1. Information of the qPCR primer sequences, Related to Figure 1.**

| Primer(for qPCR)  | Forward primer (5' to 3') | Reverse primer (5' to 3') |
|-------------------|---------------------------|---------------------------|
| LINC00162         | ACTGCCTGGACTTTCAAGAGG     | CCTCTTGGGTAGGGTGTGG       |
| RP11-152P17.2-007 | AGGCTTCTGCGATTAGCTTCT     | ACTCCATACTCTCCCTGGGTT     |
| RP11-548L20.1-001 | ACAGTGACAAGACCCAAGATT     | TGGAGTATCAGCAAGAACAGTG    |
| RP11-527H14.3-001 | GGGTAGCATCGCAGTCACT       | TCTCTTCTCGGTCTTTCTG       |
| RP11-152P17.2-001 | AGGAAGTGTGCAGAGAAGATGA    | AATGACTCCCTCAAGTTGTACG    |
| PTTG1IP           | CCAGTTACAAGCGTCTTGCC      | CGCCTCAAAGTTCACCCAAC      |
| ADARB1            | TAGAGTCTGGTGAGGGGACG      | GGAGATCCGCTGGTACATGG      |
| UBE2G2            | GGTACTGAACGACGTCCCTG      | AAGATGGCAGTCTCTCCCT       |
| SUMO3             | TCAGATTCAGGTTTCGACGGG     | ACAAATCGGAAGTCGCCCTG      |
| ITGB2             | GTGCGGTGAGTTCTGTGTTC      | CCCGGGA ACTTCTGTCTATGG    |
| POFUT2            | CGGAGGCGTTGCGATTATTG      | AACCTTTGAAAGCCACCCGA      |
| FAM207            | CAGCAGGGAGAGCAACAAGC      | TCCTGAAACCGGGTCTTTC       |
| GAPDH             | ATCAATGGAAATCCCATCACCA    | GACTCCACGACGTACTCAGCG     |

**Table S2. RNA oligonucleotide sequences of siRNAs, Related to Figure 4.**

| RNA oligos       | Sequences                                                                         |
|------------------|-----------------------------------------------------------------------------------|
| siRNA-NC         | Sense: 5'- UUCUCCGAACGUGUCACGUTT -3'<br>Anti-sense: 5'- ACGUGACACGUUCGGAGAATT -3' |
| LINC00162 siRNA1 | Sense: 5'- GCCUCUUCCUCAGACAUCUTT -3'<br>Anti-sense: 5'- AGAUGUCUGAGGAAGAGGCTT -3' |
| LINC00162 siRNA2 | Sense: 5'- CGCCUCAGUUUCAGAUUGATT -3'<br>Anti-sense: 5'- UCAAUCUGAAACUGAGGCGTT -3' |
| PTTG1IP siRNA1   | Sense: 5'- GAAGAACGUCUCCUGUCUUTT-3'<br>Anti-sense: 5'- AAGACAGGAGACGUUCUUCTT-3'   |
| PTTG1IP siRNA2   | Sense: 5'- GCUGAUCAUCACCAUGUCGTT-3'<br>Anti-sense: 5'- CGACAUGGUGAUGAUCAGCTT-3'   |
| THRAP3 siRNA1    | Sense: 5'- GGGAUUCCGAGGUCACAATT-3'<br>Anti-sense: 5'- UUGUGACCUCGGAAAUCCCTT-3'    |
| THRAP3 siRNA2    | Sense: 5'- GCUCAGGAACGCAAGCUUUTT-3'<br>Anti-sense: 5'- AAAGCUUGCGUUCUGAGCTT-3'    |

**Table S3. Probe sequences of RNA FISH and pull-down assay, Related to Figure 3.**

| Target gene (Application)     | Sequences (5' to 3')                     |
|-------------------------------|------------------------------------------|
| LINC00162(FISH)               | GAATTTACCTCTTGAAAGTCCAGGCAGTTCAGCGG      |
| LINC00162(pull-down) Primer F | TGAAGTGCTGACGGGTGGAGCGAC                 |
| LINC00162(pull-down) Primer R | TTGATTTCCCACTGACTTGTATATTTTCAGAAACA TTTC |

# Figure S1

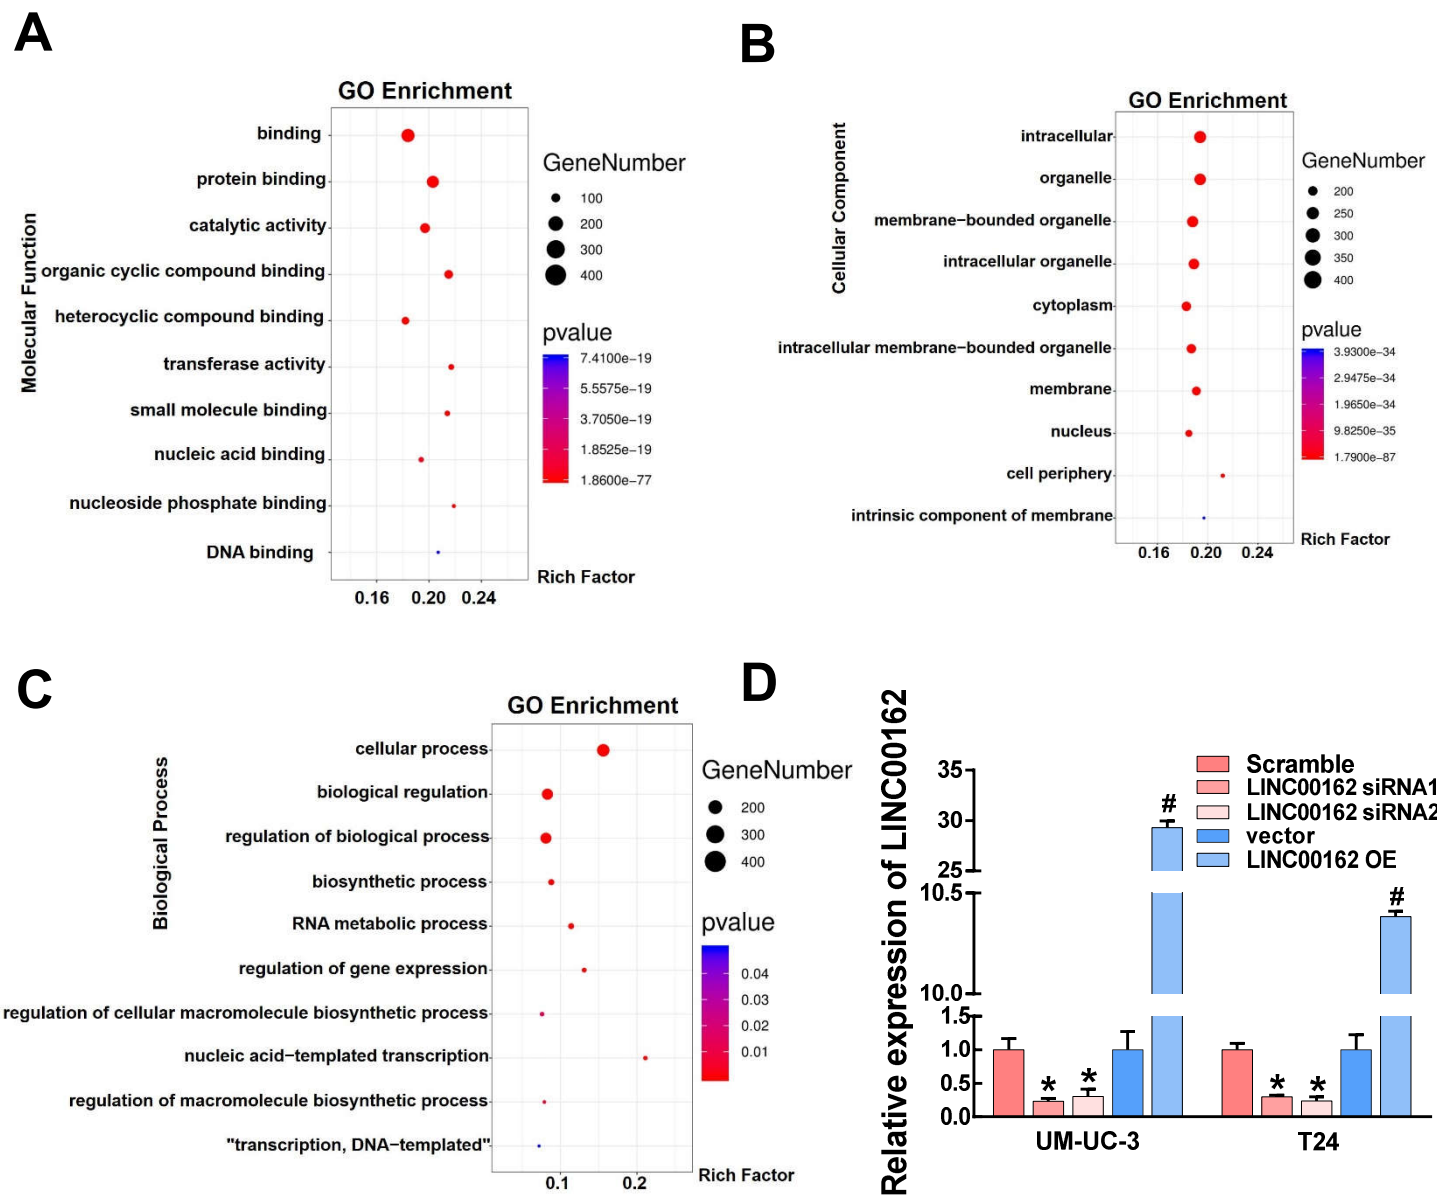

**Figure S1. Analyze the potential functions of LINC00162 and silence and overexpression efficiency verification, Related to Figure 2.**

(A) Molecular Function. (B) Cellular Component. (C) Biological Process. (D) Detection of the silencing and overexpression efficiency of LINC00162 in UM-UC-3 cells and T24 cells.

# Figure S2

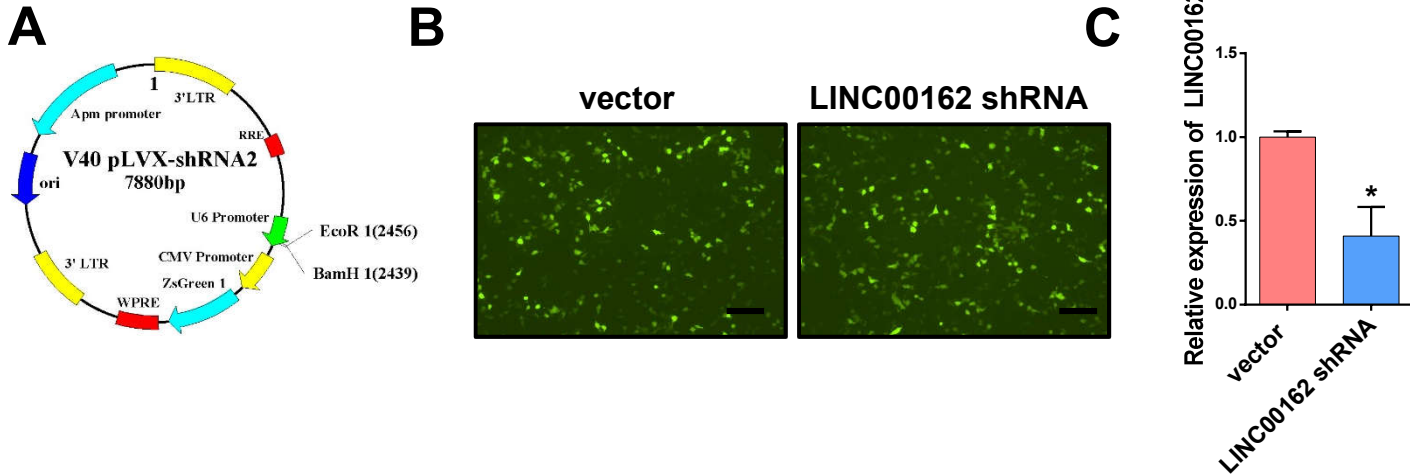

**Figure S2. Construction of LINC00162 stable knockdown UM-UC-3 cell , Related to Figure 2.**

(A) Structure of a stable knockdown plasmid vector. (B) Fluorescence picture of stable knockdown plasmid coated with lentivirus 6 hours after transfection in UM-UC-3 cells. (C) The silencing efficiency of the stable cell line that knocked down LINC00162 was detected by q-PCR.

# Figure S3

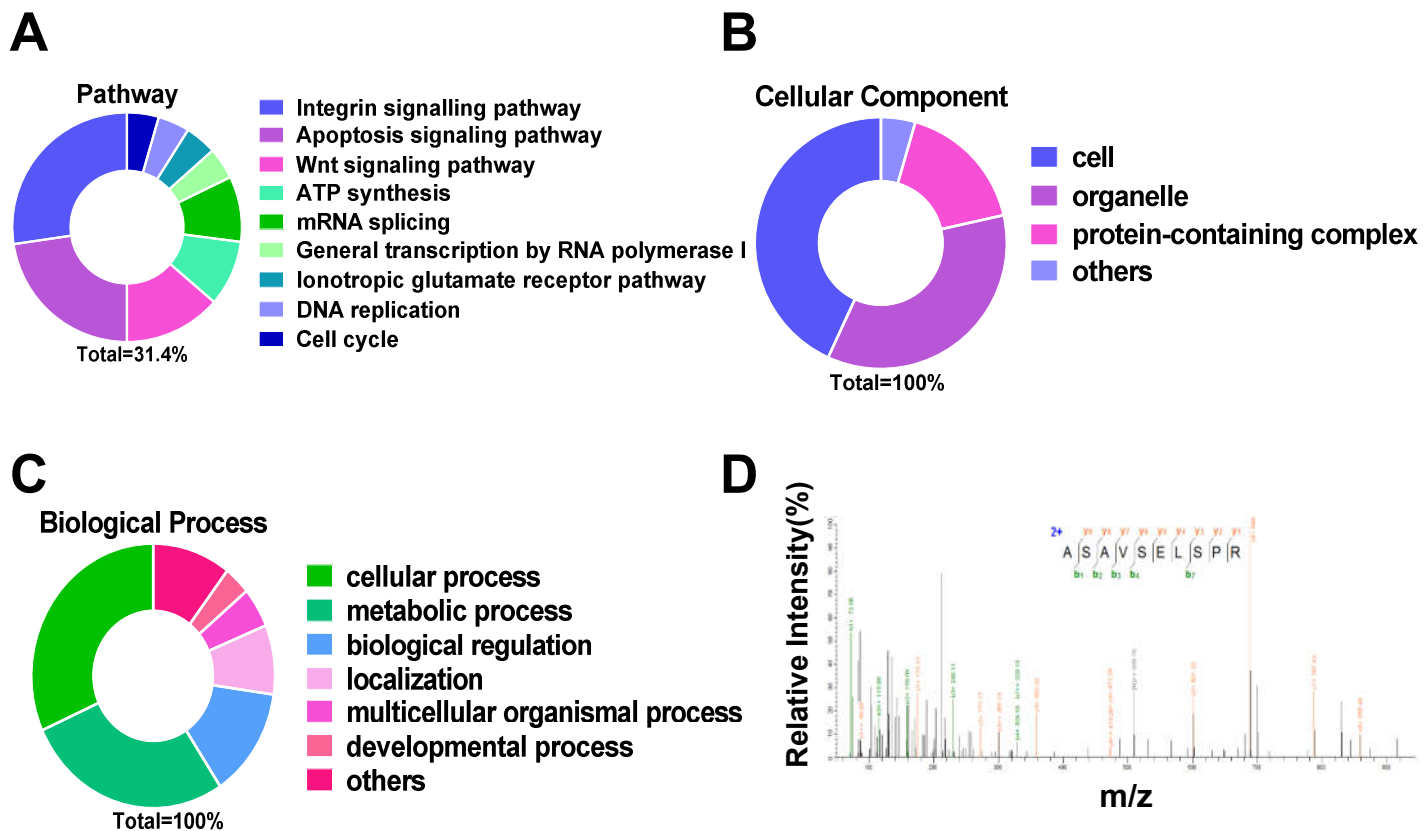

**Figure S3. Potential functional analysis of pull-down proteins and mass spectrum result of THRAP3, Related to Figure 5.**

(A) Pathway analysis of pull-down sample proteins. (B and C) GO analysis of pull-down sample proteins. (D) Mass spectrum of THRAP3 protein molecule

# 1 **Transparent Methods**

## 2 **Tissue specimens and experimental animals**

3 Thirty-two specimens of cancer and adjacent tissues from bladder cancer patients  
4 were irrespective of sex were collected from January 2018 to May 2019 in the urology  
5 department of the First Affiliated Hospital of Wenzhou Medical University. All  
6 patients underwent surgical resection and pathologically confirmed bladder cancer.  
7 Patients did not receive radiotherapy or chemotherapy before surgery. Patients were  
8 informed and signed informed consent before surgery. The research protocol was  
9 approved by the Wenzhou Medical Ethics Committee.

10 Four-week-old female athymic nude mice were purchased from Shanghai Slack  
11 Experimental Animal Center, and the experimental animal certificate number was  
12 SCXK (Su) 201904657. They were raised in the SPF-level experimental area of the  
13 Experimental Animal Center of Wenzhou Medical University. A total of 10 nude mice  
14 were used in the animal experiment of this study, and they were randomly divided  
15 into Vector and LINC00162 groups, with 5 nude mice in each group. All animal  
16 experiments were approved by the Animal Research Committee of Wenzhou Medical  
17 College, and animal research has been conducted in accordance with international  
18 guidelines.

## 19 **Cell lines and main reagents**

20 The human bladder cancer cell lines UM-UC-3 and T24, and the normal bladder  
21 epithelial cell line SV-HUC-1 were purchased from the ATCC cell bank. The qPCR  
22 kit was purchased from Promga, all qPCR primer sequences can be found in Table S1.  
23 TRIzol reagent was purchased from Invitrogen, and the GoScript™ Reverse  
24 Transcription System reagent was purchased from Promga.

25 LINC00162 overexpression vector (pcDNA3.1 (+/-)) was purchased from Guangzhou  
26 Bersinbio Company, PTTG1IP antibody was purchased from Abcam Company in the  
27 United States, THRAP3 antibody was purchased from Proteintech Company in the  
28 United States. Tubulin and GAPDH antibodies were purchased from Abway Company.  
29 Horseradish peroxidase (HRP)-labeled goat anti-mouse and rabbit IgG secondary  
30 antibodies were purchased from Cell Signaling Technology. The Luminescent Cell  
31 Viability Assay detection kit was purchased from Promega. Cell cycle detection kits  
32 were purchased from KGI. A RiboFECT CP transfection kit was purchased from

33 Guangzhou RiboBio Co., Ltd. CHIRP kits and RIP kits were purchased from the  
34 Guangzhou Bersinbio Company.

### 35 **Cell culture and transfection**

36 The human bladder cancer cell lines UM-UC-3 and T24 and the normal bladder  
37 epithelial cell line SV-HUC-1 were placed in complete medium supplemented with  
38 10% fetal bovine serum, 100U/ml penicillin and 100µg/ml streptomycin, cultured in  
39 an incubator at 37°C and 5% CO<sub>2</sub> saturation humidity. Finally, a good and stable cell  
40 line was obtained for subsequent experiments. UM-UC-3 and T24 cell lines were  
41 transfected with riboFECT CP transfection reagent for siRNA or scramble according  
42 to the instructions, siRNAs sequence can be found in Table S2. After 48 h of  
43 transfection, the transfection efficiency was determined by q-PCR.

### 44 **ATP and EdU assay**

45 Cell Titer-Glo 2.0 Viability Assay detection kit was used to detect cell proliferation  
46 ability. Cells were seeded in 96-well plates and cultured in an incubator. Then cells  
47 were treated separately in groups as described in the text. 25µL of DDW and 25µl of  
48 ATP reagent were added to each well, plates were shaken in dark for five minutes and  
49 allowed to stand for ten minutes, and the fluorescence value was then measured with a  
50 microplate reader. The 5-ethynyl-2'-deoxyuridine (EdU) detection kit was used for  
51 cell proliferation detection according to the manufacturer's instructions. The main  
52 process was as follows: The EdU solution was diluted with a complete cell culture  
53 medium at a ratio of 1,000:1 to prepare an appropriate amount of 50uM EdU medium.  
54 100µl of 50uM EdU medium was added to each well and incubate for two hours.  
55 100µL of cell fixation solution (4% paraformaldehyde in PBS) was added to each well  
56 and incubate for 30 minutes at room temperature. 2mg/mL glycine was added to each  
57 well and incubate for five minutes on a shaker. 100µl of 1X Apollo® Staining  
58 Reaction Solution was added to each well, and incubated for 30 minutes in a dark  
59 place at room temperature. Hoechst33342 reaction solution was diluted with  
60 deionized water at a ratio of 100:1, and store it in the dark. 100µL of 1X Hoechst  
61 33342 reaction solution was added to each well. Plates were incubated for 30 minutes  
62 in dark at room temperature and shaken to remove the staining reaction solution.  
63 100µL of PBS was added to each well and washed one to three times to elute Hoechst  
64 33342 reaction solution. Images were acquired under a fluorescence microscope.

65 **Annexin-V-FITC / PI staining flow cytometry**

66 The cell cycle was detected on a flow cytometer using the Cycle Detection Kit  
67 (KeyGen Biotech). And the cell apoptosis was detected using cell apoptosis Kit  
68 (KeyGen Biotech). Both experiments were carried out in strict accordance with the  
69 instructions.

70 **Western Blot (WB) assay**

71 Cell lysis buffer (10mM Tris-HCl, pH 7.4, 1% SDS and 1mM Na<sub>3</sub>VO<sub>4</sub>) was used to  
72 prepare whole cell extracts, and proteins were extracted from cultured cells of each  
73 group. A BioDrop microanalyzer was used to determine protein concentration. Equal  
74 amounts of protein were separated by SDS-PAGE, transferred to a membrane,  
75 blocked, and the first antibody was added, and incubated at 4 °C overnight. On the  
76 next day, add goat anti-rabbit or mouse IgG second antibody coupled to alkaline  
77 phosphatase (AP) and incubate at 4 °C for three hours. A Typhoon FLA 7000 (GE,  
78 Pittsburgh, PA, USA) scanner was used to obtain images.

79 **Nude mouse xenograft model**

80 A vector of 3×10<sup>6</sup> cell density or LINC00162 shRNA UM-UC-3 stable cell line was  
81 inoculated subcutaneously in female athymic nude mice to construct a subcutaneous  
82 xenograft tumor model of nude mouse bladder cancer cells. Once the maximum tumor  
83 size reached 1,000 mm<sup>3</sup>, the animals were sacrificed and the tumors were dissected  
84 for measurement.

85 **Chromatin Isolation by RNA Purification (CHIRP) assay**

86 Prepare cell suspension, lysate and sonicate according to the instructions of the ChIRP  
87 kit (Bersinbio, Guangzhou, China), and design a LINC00162 specific probe to attach  
88 to magnetic beads, probe sequence can be found in Table S3. The magnetic beads and  
89 cell lysate are incubated together to pull down the target RNA while enriching the  
90 DNA that interacts with it. The content of each gene in the product was detected by  
91 q-PCR.

92 **RNA-FISH assay**

93 Subcellular localization of LINC00162 was performed by FISH. Design a  
94 FISH-specific probe for LINC00162 (Sangon Biotech, Shanghai, China), probe  
95 sequence can be found in Table S3. Cells seeded on coverslips were fixed with 4%



96 paraformaldehyde for 20 minutes at room temperature and digested with proteinase K  
97 (Sangon Biotech) for 5 minutes at 37 °C . Next, the cells were fixed with 1%  
98 paraformaldehyde for 10 minutes and dehydrated in a gradient of 70%, 85%, and  
99 100% alcohol. The probe-mixed solution was dropped on a coverslip, mounted and  
100 denatured at 73 °C for 3 minutes. In the dark, the hybridization lasted for 12-16 hours  
101 at 37 °C . Coverslips were counted with DAPI and fixed with anti-fluorescent  
102 attenuation reagent. The cells were examined and images were acquired under a  
103 confocal microscope (Leica, Mannheim, Germany).

#### 104 **RNA Immunoprecipitation (RIP) assay**

105 Refer to the instructions of the RIP Kit (Bersinbio, Guangzhou, China) to treat the  
106 cells. Use THRAP3 antibody to capture the endogenous RNA-binding protein in the  
107 cytoplasm to prevent non-specific RNA binding. Immunoprecipitation separates the  
108 RNA-binding protein and its bound RNA together. q-PCR detects RNA fragments  
109 precipitated by RIP.

#### 110 **RNA pull-down assay**

111 The RNA-specific probes designed for LINC00162 were attached to magnetic beads  
112 and the cells were lysed according to the instructions of the RNA pull-down Kit  
113 (Bersinbio, Guangzhou, China). The magnetic beads were incubated with the cell  
114 lysate, and the protein interacting with LINC00162 was pulled. The pull down  
115 product was analyzed by mass spectrometry.

#### 116 **Immunohistochemistry (IHC)**

117 Nude mouse transplanted tumor tissue was embedded with hard wax, sliced, dewaxed  
118 and rehydrated. After incubation with primary and secondary antibodies, it was  
119 counterstained with hematoxylin (Solarbio, China). Images were taken with  
120 microscopes at 100x and 400x magnification (Leica, Mannheim, Germany). IHC  
121 antibody: PTTG1IP (Abcam, USA).

#### 122 **Statistical analysis**

123 GraphPad Prism 6 software was used for statistical analysis. Comparisons between  
124 groups were performed using two independent sample t tests. The difference was  
125 statistically significant at  $P < 0.05$ . And data are represented as mean  $\pm$  standard  
126 deviation (SD).
